# Supplementary material for: Tapping into cyanobacteria electron transfer for higher exoelectrogenic activity by imposing iron limited growth
Source: Royal Society of Chemistry journal article supplement (doi:10.1039/c8ra00951a), 2018-01-01
Supplement: c8ra00951a1.pdf [file c8ra00951a1.pdf]

## Tapping into cyanobacteria electron transfer for higher exoelectrogenic activity by imposing iron limited growth

A. C. Gonzalez-Aravena,<sup>a</sup> K. Yunus,<sup>a</sup> L. Zhang,<sup>b</sup> B. Norling<sup>b</sup> and A. C. Fisher<sup>\*a</sup>

<sup>a</sup> Department of Chemical Engineering and Biotechnology, University of Cambridge, West Site, Philippa Fawcett Dr, Cambridge CB3 0AS, UK.

<sup>b</sup> School of Biological Sciences, Nanyang Technological University, 60 Nanyang Drive, 637551, Singapore.

\* acf42@cam.ac.uk

### Supplementary Information

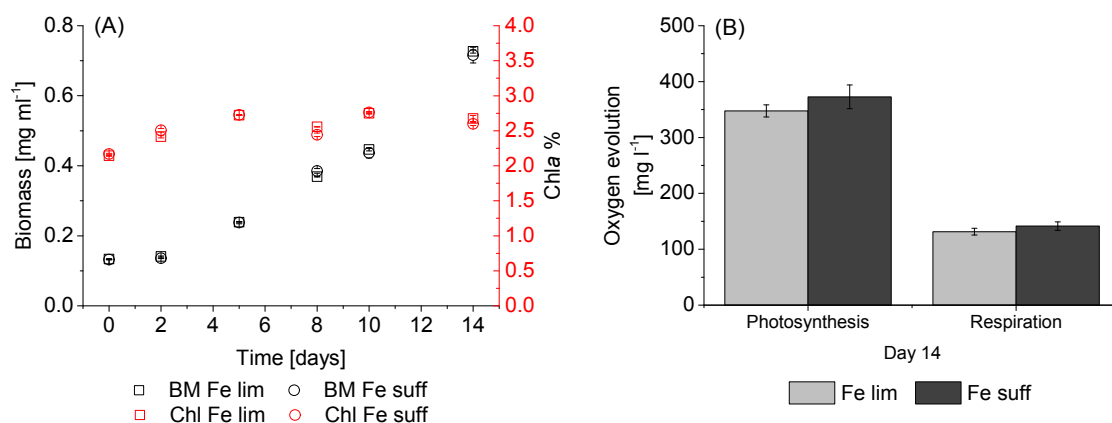

Figure 1. (A) Growth curve of PCC7942 in iron limited and iron sufficient conditions at 30 °C and 120 rpm, under light intensity of 90  $\mu\text{mol m}^{-2} \text{s}^{-2}$  in a 12 hour light/dark cycle. From the graph, exponential growth rates calculated as  $\ln(\text{Day 8} - \text{Day 2})/3$ , equal to 0.138  $\text{day}^{-1}$ , equivalent to 5 days doubling time. (B) Photosynthetic and respiration rates at Day 14 of cultures of PCC7942 in iron limited and iron sufficient conditions as oxygen evolution in the light (photosynthesis) and in dark immediately after (respiration). ( $n=3 \pm 1\text{SE}$ ).

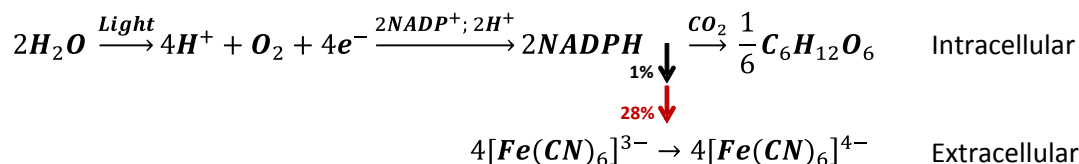

Equation 1. Photo-biocatalysis in electron transfer from water to extracellular ferricyanide by PCC7942 at Day 14. Iron limited cells present an enhanced redirection of electrons (red arrow) over iron sufficient cells (black arrow) at neutral pH. Estimated percentages are calculated as moles of electrons reducing ferricyanide over moles of electrons generated in O<sub>2</sub> evolution (photosynthetic rates), 4 mol of ferricyanide require 1 mol of O<sub>2</sub>. FeCN-R rates in the dark were subtracted previous to calculating the percentages of photo-biocatalysis. Ferrocyanide can be reoxidised in the anode of an electrochemical cell for generation of photo-bioelectricity.

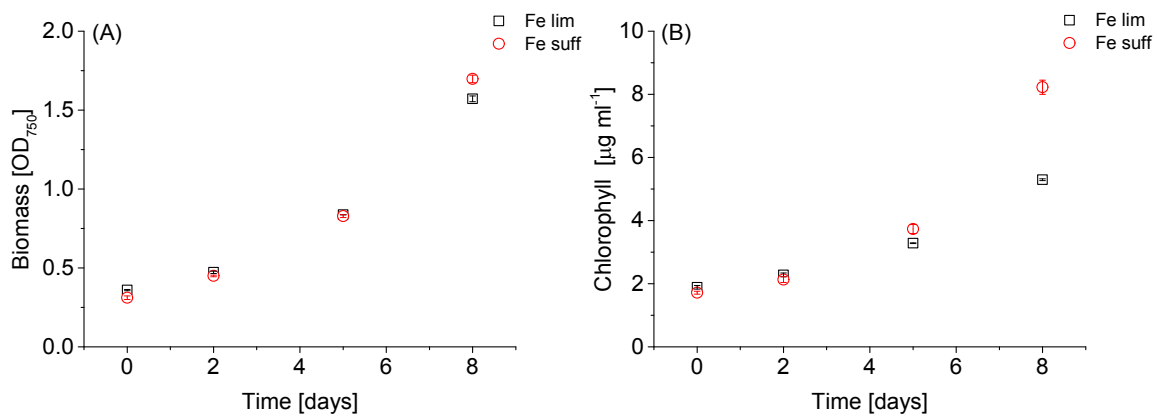

Figure 2. (A) Growth curve and (B) chlorophyll content of *C. vulgaris* cultures in iron sufficient and iron limited condition at 30 °C and 120 rpm, under light intensity of 90 µmol m<sup>-2</sup> s<sup>-2</sup> in a 12 hour light/dark cycle. From the graph, exponential growth rates calculated as  $\ln(\text{Day } 8 - \text{Day } 2)/3$ , equal to 0.20 day<sup>-1</sup> and 0.22 day<sup>-1</sup> for iron limited and iron sufficient cultures respectively, equivalent to 3.5 and 3.1 days doubling time. (n=3 ±1SE).

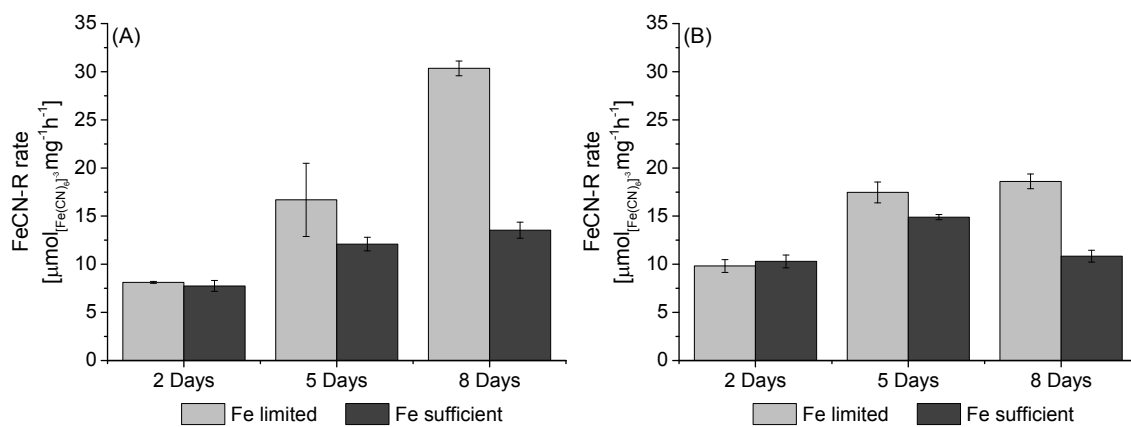

Figure 3. Ferricyanide reduction rates of *C. vulgaris* cultures conditioned by iron availability (A) in the light and (B) in darkness. (n=3±1SE).
